# Supplementary material for: Secondary Metabolites Isolated from Artemisia afra and Artemisia annua and Their Anti-Malarial, Anti-Inflammatory and Immunomodulating Properties—Pharmacokinetics and Pharmacodynamics: A Review
Source: MDPI journal article supplement (doi:10.3390/metabo13050613), 2023-04-29
Supplement: s1 [file s1]

# Supplementary material.

**Table S1:** Monoterpenes isolated from *A. annua* and *A. afra*.

| N  | Compound                                                                             | <i>A. annua</i> | <i>A. afra</i> | Reference     |
|----|--------------------------------------------------------------------------------------|-----------------|----------------|---------------|
| 1  | $\alpha$ -myrcene hydroperoxide                                                      | P               | A              | [135]         |
| 2  | (-)-Myrtenyl acetate                                                                 | P               | A              | [136]         |
| 3  | $\beta$ -myrcene hydroperoxide                                                       | P               | A              | [135]         |
| 4  | $\beta$ -Sabinene hydrate                                                            | P               | A              | [137]         |
| 5  | (E)-3,7-Dimethyl-1,3,6-octatriene                                                    | P               | A              | [137]         |
| 6  | (E)-2-Butenoic acid, 2-methyl-, 2,2-dimethyl-1-(2-methyl-1-propenyl)- 3-buteyl ester | P               | A              | [137]         |
| 7  | (E)-7-hydroperoxy-2,7-dimethylocta-2,5-dien-4-one                                    | P               | A              | [23]          |
| 8  | (E)-7-hydroxy-2,7-dimethylocta- 2,5-dien-4-one                                       | P               | A              | [23]          |
| 9  | (E)-Isobutyric acid                                                                  | P               | A              | [138]         |
| 10 | 1,10-Oxy- $\alpha$ -myrcene hydroxide                                                | P               | A              | [135,139]     |
| 11 | 1,10-Oxy- $\beta$ -myrcene hydroxide                                                 | P               | A              | [135]         |
| 12 | 1,4-cineole                                                                          | P               | A              | [6]           |
| 13 | 1,8-cineole                                                                          | p               | p              | [66,140]      |
| 14 | 2-Butenoic acid, 3-methyl- (1S,2R,4S)-1,7,7-trimethylbicyclo[2.2.1]hept-2-yl ester   | P               | A              | [141]         |
| 15 | 2-Cyclohexen-1-one, 2-methyl-5-(1-methylcyclopropyl)                                 | P               | A              | [137]         |
| 16 | 2-methyl butyl isovalerate                                                           | A               | P              | [139]         |
| 17 | 2-methyl butyl isovalerate                                                           | A               | P              | [139]         |
| 18 | 2-methyl-6- methylene- 1,7-Octadien-3-one                                            | P               | A              | [141]         |
| 19 | 2- $\alpha$ -Hydroxy-1,8-cineole                                                     | P               | A              | [142]         |
| 20 | 2,3-Dihydro-1,8-cineole                                                              | P               | P              | [137,139,140] |
| 21 | 2,6-Dimethyl-1,3,5,7-octatetraene                                                    | P               | A              | [138]         |
| 22 | 2,6-Dimethyl-1,5,7-octatrien-3-ol                                                    | P               | A              | [136]         |
| 23 | 2,6-Dimethyl-3,5,7-octatrien-2-ol                                                    | P               | A              | [136]         |
| 24 | 2,6-Dimethyl-3,5,7-octatrien-2-ol                                                    | P               | A              | [137,143]     |
| 25 | 2,6-Octadien-1-ol, 2,6-dimethyl-8-[(tetrahydro-2H-pyran-2-yl) oxy]                   | P               | A              | [136]         |
| 26 | 2,6,6-trimethyl-4-methylene Bicyclo[3.1.1]heptan-3-one                               | P               | A              | [40]          |
| 27 | 3-Cyclohexene-1-methanol 2-hydroxy- $\alpha$ , $\alpha$ ,4-trimethyl-, 1-acetate     | P               | A              | [144]         |
| 28 | 3-Pinanol                                                                            | P               | A              | [145]         |
| 29 | 3-thujanone                                                                          | P               | P              | [145,146]     |
| 30 | 3-Thujen-10-al                                                                       | P               | A              | [147]         |
| 31 | 3-Thujen-2-ol                                                                        | P               | A              | [6]           |
| 32 | 3,7-Dimethyl-1,5,7-octatrien-3-ol                                                    | P               | A              | [148]         |
| 33 | 3,7-Octadien-2-ol, 2-methyl-6-methylene                                              | P               | A              | [141]         |
| 34 | 3,7-Octadien-2-ol, 2,6-dimethyl                                                      | P               | A              | [136]         |
| 35 | 4-Hydroxy-2-isopropenyl-5- methylene-hexan-1-ol                                      | P               | A              | [135]         |
| 36 | 4-Terpineol                                                                          | P               | P              | [137,149]     |
| 37 | 4-Terpinyol acetate                                                                  | P               | A              | [150]         |
| 38 | 4 $\alpha$ -hydroxy achipendol                                                       | A               | P              | [139]         |
| 39 | 4 $\beta$ -hydroxy achipendol                                                        | A               | P              | [139]         |

|    |                                                                                                   |   |   |               |
|----|---------------------------------------------------------------------------------------------------|---|---|---------------|
| 40 | 6- hydroxy- $\gamma$ -humulene                                                                    | P | A | [23]          |
| 41 | 6,7-epoxy-6,7-dihydro- $\beta$ -farnesene                                                         | P | A | [23]          |
| 42 | 7-methyl-3- methylene-1,6-Octadien-4-one                                                          | P | A | [137,142]     |
| 43 | Allo-ocimene                                                                                      | P | P | [151]         |
| 44 | Arteannuin P                                                                                      | P | A | [23]          |
| 45 | Arteannuin Q                                                                                      | P | A | [23]          |
| 46 | Artemisia alcohol                                                                                 | P | P | [139,152]     |
| 47 | Artemisia ketone                                                                                  | P | P | [139,153]     |
| 48 | Artemisiatriene                                                                                   | P | A | [136]         |
| 49 | Artemisyl acetate                                                                                 | P | P | [139,147]     |
| 50 | Ascaridole                                                                                        | P | P | [139,146]     |
| 51 | Azulene                                                                                           | A | P | [66]          |
| 52 | Borneol                                                                                           | p | p | [66,137]      |
| 53 | Borneol isobutyrate                                                                               | P | A | [137]         |
| 54 | Bornyl acetate                                                                                    | P | A | [137,147]     |
| 55 | Bornyl valerate                                                                                   | P | A | [141]         |
| 56 | Camphene                                                                                          | A | P | [139]         |
| 57 | Camphor                                                                                           | P | p | [139,144]     |
| 58 | Carvacrol                                                                                         | P | A | [137]         |
| 59 | Carvone                                                                                           | p | p | [144]         |
| 60 | Caryophylla-2(12),6(13)- dien-5-one                                                               | A | P | [139]         |
| 61 | Chrysanthenone                                                                                    | P | P | [137,139,152] |
| 62 | Cis-1,2-epoxy- terpinen-4-ol                                                                      | A | P | [139]         |
| 63 | Cis-2,7-dimethyl-4- octene-2,4-diol                                                               | A | P | [154]         |
| 64 | Cis-carveol                                                                                       | P | P | [145,149,153] |
| 65 | Cis-carvyl acetate                                                                                | P | A | [140]         |
| 66 | Cis-chrysanthenol                                                                                 | P | P | [139,140]     |
| 67 | Cis-chrysanthenyl acetate                                                                         | P | P | [139,140]     |
| 68 | Cis-epoxyocimene                                                                                  | P | A | [138]         |
| 69 | Cis- <i>p</i> -menth-2-en-1-ol                                                                    | P | P | [137,144]     |
| 70 | Cis- <i>p</i> -Menth-2-en-1-ol                                                                    | P | A | [140,147]     |
| 71 | Cis- <i>p</i> -mentha-1-(7), 8-dien-2-ol                                                          | P | P | [137,139]     |
| 72 | Cis-pinocarveol                                                                                   | P | A | [40]          |
| 73 | Cis-sabinene hydrate                                                                              | P | P | [139], [140]  |
| 74 | Citronellal                                                                                       | P | A | [146]         |
| 75 | Citronellol                                                                                       | P | A | [6]           |
| 76 | Cuminal                                                                                           | P | A | [144,147]     |
| 77 | Cuminic alcohol                                                                                   | P | P | [139,155]     |
| 78 | Cyclopentanecarboxylic acid, 3-<br>methylene-, 1,7,7-trimethylbicyclo- [2.2.1]<br>hept-2-yl ester | P | A | [141]         |
| 79 | Dehydro carvyl acetate                                                                            | P | P | [139,147]     |
| 80 | Dehydrosabinaketone                                                                               | A | P | [139]         |
| 81 | Endo-dehydronorborneo                                                                             | P | A | [136]         |
| 82 | Furanoid trans- <i>p</i> -menth-2,8- dien-1-ol                                                    | A | P | [139]         |
| 83 | Geraniol                                                                                          | P | P | [156]         |
| 84 | Geranyl acetate                                                                                   | P | A | [136,40,156]  |
| 85 | Ipsdienol                                                                                         | P | A | [147]         |
| 86 | Iso-menthone                                                                                      | P | A | [141]         |
| 87 | Isoamyl isovalerate                                                                               | A | P | [139]         |
| 88 | Isobornyl acetate                                                                                 | P | A | [140]         |
| 89 | Isopiperitone                                                                                     | A | P | [153]         |

|     |                                                     |   |   |               |
|-----|-----------------------------------------------------|---|---|---------------|
| 90  | Lavandulane                                         | P | A | [157]         |
| 91  | Lavandulol                                          | P | P | [135,139]     |
| 92  | Lavandulyl acetate                                  | P | A | [140]         |
| 93  | Lavanduyl acetate                                   | P | P | [135,139]     |
| 94  | Lemonene                                            | P | P | [40,139]      |
| 95  | Limonene-1,2-epoxide                                | P | A | [147,155]     |
| 96  | Linalol                                             | A | P | [139]         |
| 97  | Linalool acetate                                    | A | P | [145]         |
| 98  | Linalyl acetate                                     | P | A | [137]         |
| 99  | Menthol                                             | P | A | [144,155]     |
| 100 | Myrcene                                             | P | P | [138,144]     |
| 101 | Myrcenol                                            | P | A | [40]          |
| 102 | Myrtenal                                            | P | P | [144,152]     |
| 103 | Myrtenol                                            | P | P | [140,144]     |
| 104 | Nerol                                               | P | A | [136]         |
| 105 | Neryl acetate                                       | P | A | [147]         |
| 106 | <i>p</i> -Cymen-8-ol                                | P | P | [137]         |
| 107 | <i>p</i> -Cymene                                    | P | P | [139,148]     |
| 108 | <i>p</i> -Menth-1-en-5-ol                           | P | A | [155]         |
| 109 | <i>p</i> -Menth-2,8-dien-1-ol                       | P | A | [137]         |
| 110 | <i>p</i> -Menth-3-ene                               | P | A | [138]         |
| 111 | P-mentha-1,4-dien-7-ol                              | A | P | [139]         |
| 112 | <i>p</i> -Mentha-1,4(8)-dien-3-ol                   | P | A | [137]         |
| 113 | P-mentha-1,8-dien-10-ol                             | P | A | [137]         |
| 114 | P-mentha-1,8-dien-10-ol                             | A | P | [139]         |
| 115 | <i>p</i> -Mentha-1(7),5-dien-2-ol                   | P | A | [137]         |
| 116 | <i>p</i> -Mentha-1(7),8-dien-2-ol                   | P | P | [151]         |
| 117 | <i>p</i> -Mentha-2,4-diene                          | P | A | [144]         |
| 118 | P-menthatriene                                      | A | P | [156]         |
| 119 | Perillaldehyde                                      | P | A | [147]         |
| 120 | Perillene                                           | P | A | [136]         |
| 121 | Phellandral                                         | P | A | [136]         |
| 122 | Pinocarvone                                         | P | P | [139,140]     |
| 123 | Pinocarvyl acetate                                  | P | A | [40]          |
| 124 | Piperitol                                           | P | P | [6,144]       |
| 125 | Piperitone                                          | P | P | [6,139]       |
| 126 | Sabina ketone                                       | P | P | [123,126]     |
| 127 | Sabinene                                            | P | P | [139,151]     |
| 128 | Sabinol                                             | P | A | [137]         |
| 129 | Sabinyl acetate                                     | P | P | [139,140,151] |
| 130 | Santolina alcohol                                   | P | A | [140,151]     |
| 131 | Santolinatriene                                     | P | A | [138,151]     |
| 132 | Terpinen-4-ol                                       | p | p | [139]         |
| 133 | Terpinolene                                         | P | P | [137,139]     |
| 134 | Thymol                                              | P | A | [137]         |
| 135 | Trans- pinocarveol                                  | P | P | [137,139]     |
| 136 | trans-5-Hydroxy-2-isopropenyl-5-methylhex-3-en-1-ol | P | A | [157]         |
| 137 | trans-Carvyl acetate                                | P | A | [140]         |
| 138 | trans-Chrysanthenol                                 | P | A | [140]         |
| 139 | Trans-linalool oxide                                | A | P | [66]          |
| 140 | Trans-p-menth-1(7), 8-dien-2-ol                     | A | P | [139]         |

|     |                                                                 |   |   |               |
|-----|-----------------------------------------------------------------|---|---|---------------|
| 141 | Trans-p-meth-2-en-1-ol                                          | P | P | [144]         |
| 142 | Trans-piperitone oxide                                          | P | P | [6,139]       |
| 143 | Trans-sabinene hydrate                                          | P | P | [139,140]     |
| 144 | Trans-sabinol                                                   | a | p | [139]         |
| 145 | trans-Sabinyol acetate                                          | P | A | [137]         |
| 146 | Trans- $\alpha$ -ocimene                                        | P | P | [145,151]     |
| 147 | Verbenone                                                       | P | A | [136]         |
| 148 | Verbenyl acetate                                                | P | A | [136]         |
| 149 | Yomogi alcohol                                                  | P | A | [137]         |
| 150 | (Z)-3,7-Dimethyl-1,3,6-octatriene                               | P | A | [137,139,140] |
| 151 | $\alpha$ -Fenchene                                              | A | P | [144]         |
| 152 | $\alpha$ -Myrcene hydroperoxide/ $\beta$ -myrcene hydroperoxide | P | A | [135]         |
| 153 | $\alpha$ -Phellandrene                                          | P | A | [137]         |
| 154 | $\alpha$ -pinene                                                | P | P | [137,145]     |
| 155 | $\alpha$ -Terpinene                                             | P | P | [139,158]     |
| 156 | $\alpha$ -Terpineol                                             | P | P | [146,148]     |
| 157 | $\alpha$ -Thujene                                               | P | P | [139,159]     |
| 158 | $\alpha$ -Thujone                                               | p | p | [138,139]     |
| 159 | $\beta$ -Phellandrene                                           | p | p | [145,147]     |
| 160 | $\beta$ -Pinene                                                 | P | P | [40,139,140]  |
| 161 | $\beta$ -Pinene oxide                                           | P | A | [140]         |
| 162 | $\beta$ -Thujene                                                | p | p | [146,159]     |
| 163 | $\beta$ -Thujone                                                | p | p | [138]         |
| 164 | $\gamma$ -Terpinene                                             | P | P | [137,139]     |
| 165 | $\delta$ -Terpineol                                             | P | P | [139,140]     |

P = Present, A = Absent

**Table S2:** Sesquiterpenes from *A. annua* and *A. afra*

| N   | Compound                                                             | <i>A. annua</i> | <i>A. afra</i> | Reference     |
|-----|----------------------------------------------------------------------|-----------------|----------------|---------------|
| 166 | (-)-Amorpha-4,11-diene                                               | P               | A              | [160]         |
| 167 | (-)-Spathulenol                                                      | P               | P              | [139,140,147] |
| 168 | $\alpha$ -Bisabolol                                                  | P               | P              | [137,139]     |
| 169 | $\delta$ -Cadinene                                                   | P               | A              | [6,141]       |
| 170 | $\alpha$ -Cadinene                                                   | P               | P              | [152]         |
| 171 | $\alpha$ -Cadinol                                                    | P               | A              | [137]         |
| 172 | $\gamma$ -Caryophyllene                                              | p               | P              | [141]         |
| 173 | $\beta$ -Elemene                                                     | P               | A              | [6,19]        |
| 174 | $\gamma$ -Elemene                                                    | P               | A              | [141]         |
| 175 | $\delta$ -Elemene                                                    | P               | A              | [141]         |
| 176 | $\alpha$ -Epoxy-dihydroartemisinic                                   | P               | A              | [161]         |
| 177 | $\beta$ -Hydroxy-4(15),7-eudesmadiene                                | P               | A              | [162]         |
| 178 | $\delta$ -Muurolene                                                  | P               | A              | [137]         |
| 179 | $\beta$ -Selinene                                                    | p               | P              | [6,139]       |
| 180 | (+)-Germacrene A                                                     | P               | A              | [163]         |
| 181 | (1R,3Z,9S)-Bicyclo[7.2.0]undec-3-ene, 4,11,11-trimethyl-8-methylene- | P               | A              | [138]         |
| 182 | (E)-nerolidol                                                        | A               | P              | [139]         |
| 183 | (E)-Nerolidyl acetate                                                | P               | A              | [164]         |
| 184 | (Z)-1,3(15),6,10-Farnesatetraene                                     | P               | A              | [122,123]     |

|     |                                                                               |   |   |       |
|-----|-------------------------------------------------------------------------------|---|---|-------|
| 185 | (Z)-7-acetoxy-methyl-11-methyl-3-methylenedodeca-1,6,10-triene                | P | A | [165] |
| 186 | (Z)-jasmone                                                                   | A | P | [139] |
| 187 | 1-epi-cubenol                                                                 | A | P | [139] |
| 188 | 1-octen-3-ol                                                                  | A | P | [132] |
| 189 | 1-Oxo-2β-[3-butanone]-3α- methyl-6β-[2-propanoic acid]- cyclohexane           | P | A | [162] |
| 190 | 1-Oxo-2β-[3-butanone]-3α- methyl-6β-[2-propanol formyl ester]-cyclohexane     | P | A | [162] |
| 191 | 1α-Aldehyde-2β-[3-butanone]-3α- methyl-6β-[2-propanoic acid]- cyclohexane     | P | A | [162] |
| 192 | 1α-Aldehyde-2β-[3-butanone]-3α- methyl-6β-[2-propenoic acid]- cyclohexane     | P | A | [162] |
| 193 | 1β-Hydroxy-4(15),5-eudesmadiene                                               | P | A | [162] |
| 194 | 1β-Hydroxy-4(15),5(E),10(14)-germacratriene                                   | P | A | [162] |
| 195 | 1β,6α-Dihydroxy-4(15)-eudesmane                                               | P | A | [162] |
| 196 | 10- <i>epi</i> -γ-Eudesmol                                                    | P | A | [137] |
| 197 | 11-hydroxy-arteannuin I                                                       | P | A | [23]  |
| 198 | 11 <i>R</i> -(-)-Dihydroartemisinic acid                                      | P | A | [137] |
| 199 | 12α,4α- dihydroxybishopsolicepolide                                           | A | P | [166] |
| 200 | 14-Hydroxy-δ-cadinene                                                         | P | A | [137] |
| 201 | 14-Hydroxy-α-humulene                                                         | P | A | [137] |
| 202 | 15- <i>nor</i> -10-Hydroxy-oplopan-4-oic acid                                 | P | A | [162] |
| 203 | 2-Naphthalenol, decahydro-1-methyl-6-methylene-4-(1-methylethenyl)            | P | A | [152] |
| 204 | 2,3-Epoxy-7,10-bisaboladiene                                                  | P | A | [146] |
| 205 | 2,6,10-Farnesatrien-1-ol acetate                                              | P | A | [164] |
| 206 | 2,7,10-Bisabolatriene                                                         | P | A | [167] |
| 207 | 3-(2-(2,5-dihydrofuran-3-yl) ethyl)-2,2-dimethyl-4- methylenecyclohexan-1-one | P | A | [23]  |
| 208 | 3-Cedren-12-ol                                                                | P | A | [137] |
| 209 | 3-Isobutylcadin-4-en-11-ol                                                    | P | A | [152] |
| 210 | 3α-Hydroxy-4α,5α-epoxy-7-oxo- (8[7→6]-abeo-amorphane                          | P | A | [162] |
| 211 | 3α,15-Dihydroxy cedrane                                                       | P | A | [162] |
| 212 | 3α -hydroxydesoxy artemisinin                                                 | P | A | [6]   |
| 213 | 3α-15-dihydroxycedrane                                                        | P | A | [162] |
| 214 | 3α, 7α -Dihydroxy-cadin-4-ene                                                 | P | A | [168] |
| 215 | 4-Amorphen,3,11-diol                                                          | P | A | [152] |
| 216 | 4-Amorphene-3,7-diol (3α,7α)                                                  |   |   | [168] |
| 217 | 4-hydroxy-4 methylcyclohex- 2-enone                                           | A | P | [139] |
| 218 | 4-Muurolen-10-ol                                                              | P | A | [6]   |
| 219 | 4,7(11)-Amorphadien-12-al                                                     | P | A | [152] |
| 220 | 4α,5α-Epoxy-6α-hydroxy amorphan-12-oic acid                                   | P | A | [161] |
| 221 | 4(15),11-Amorphadien-9-one                                                    | P | A | [152] |
| 222 | 4(15),11-Eudesmadien-5α-ol                                                    | P | A | [162] |
| 223 | 4(15),5,11-Cadinatriene                                                       | P | A | [152] |
| 224 | 4α, 5α-epoxy-6α- hydroxyartemisinic acid methyl ester                         | P | A | [23]  |
| 225 | 5α -Hydroxy-eudesma-4(15), 11-diene                                           | P | A | [168] |
| 226 | 5α-Hydroperoxy-eudesma-4(15),11-diene                                         | P | A | [162] |

|     |                                               |   |   |           |
|-----|-----------------------------------------------|---|---|-----------|
| 227 | 5 $\beta$ -hydroperoxy-eudesma-4(15),11-diene | P | A | [23]      |
| 228 | 6,7-Dehydroartemisinic acid                   | P | A | [169]     |
| 229 | 6 $\alpha$ -hydroxy-arteanuin J               | P | A | [23]      |
| 230 | 7 $\alpha$ -Dihydroxyamorph-4-ene 3-acetate   | P | A | [135]     |
| 231 | 7 $\alpha$ -hydroxy-artemisinic acid          | P | A | [23]      |
| 232 | Abeo-amorphane sesquiterpene                  | P | A | [23]      |
| 233 | Amorph-4-en-7-ol                              | P | A | [170]     |
| 234 | Amorphane epoxide,                            | P | A | [135]     |
| 235 | Annulide                                      | P | A | [137,160] |
| 236 | Ar-curcumene                                  | A | P | [139,144] |
| 237 | Aromadendrene epoxide                         | P | A | [6]       |
| 238 | Arteannoides A to E                           | P | A | [26]      |
| 239 | Arteannoides F to R                           | P | A | [26]      |
| 240 | Arteannoides U to Z                           | P | A | [39]      |
| 242 | Arteannuin A                                  | P | A | [152]     |
| 243 | Arteannuin B                                  | P | A | [171]     |
| 244 | Arteannuin B                                  | P | A | [6]       |
| 245 | Arteannuin D                                  | P | A | [136]     |
| 246 | Arteannuin E                                  | P | A | [152]     |
| 247 | Arteannuin F                                  | P | A | [29]      |
| 248 | Arteannuin O                                  | P | A | [167]     |
| 249 | Arteannuin P                                  | P | A | [28]      |
| 250 | Arteannuin Q                                  | P | A | [29]      |
| 251 | Arteannuin S                                  | P | A | [23]      |
| 252 | Arteannuin T                                  | P | A | [23]      |
| 253 | Arteannuin U                                  | P | A | [23]      |
| 254 | Arteannuin V                                  | P | A | [23]      |
| 255 | Arteannuin W                                  | P | A | [23]      |
| 256 | Arteannuin Y                                  | P | A | [23]      |
| 257 | Arteannuin Z                                  | P | A | [23]      |
| 258 | Arteannuins H, I, J, K, L, M and N            | P | A | [168]     |
| 259 | Artemanin A                                   | P | A | [29]      |
| 260 | Artemanin B                                   | P | A | [38]      |
| 261 | Artemin                                       | A | P | [172]     |
| 262 | Artemisal                                     | A | P | [66]      |
| 263 | Artemisin                                     | P | A | [173]     |
| 264 | artemisinic acid                              | P | A | [158,172] |
| 265 | Artemisinic acid methyl ester                 | P | A | [168]     |
| 266 | Artemisinic acid, 6 $\alpha$ -peroxy ester    | P | A | [23]      |
| 267 | Artemisinic aldehyde                          | P | A | [160]     |
| 268 | Artemisinin                                   | P | A | [158]     |
| 269 | Artemisinin B                                 | P | A | [6]       |
| 270 | Artemisinin G                                 | P | A | [174]     |
| 271 | Artemisinol                                   | P | A | [175]     |
| 272 | Artemisitene                                  | P | A | [153]     |
| 273 | Artesin                                       | A | P | [36]      |
| 274 | Berbenome                                     | A | P | [139]     |
| 275 | Bicycloelemene                                | A | P | [139]     |
| 276 | Bicycloelemene                                | A | P | [139]     |
| 277 | Bicyclogermacrene                             | P | P | [139,145] |
| 278 | Calamenene                                    | A | P | [139]     |
| 279 | Caryophylladienol I                           | P | A | [137]     |

|     |                                                                                                                                    |   |   |           |
|-----|------------------------------------------------------------------------------------------------------------------------------------|---|---|-----------|
| 280 | Caryophylladienol II                                                                                                               | P | P | [137]     |
| 281 | Caryophyllene oxide                                                                                                                | P | P | [121,126] |
| 282 | Cedra-8-en-13-ol, acetate                                                                                                          | P | A | [137]     |
| 283 | Cedra-8(15)-en-9 $\alpha$ -ol                                                                                                      | P | A | [137]     |
| 284 | Cedra-8(15)-en-9 $\alpha$ -ol acetate                                                                                              | P | A | [137]     |
| 285 | Cedrol                                                                                                                             | P | A | [147,152] |
| 286 | Cedryl acetate                                                                                                                     | P | A | [137]     |
| 287 | Chamazulene                                                                                                                        | A | P | [149]     |
| 288 | <i>cis</i> -Arteannuic alcohol                                                                                                     | P | A | [137]     |
| 289 | <i>cis</i> -Calamenene                                                                                                             | P | A | [137]     |
| 290 | <i>cis</i> -Caryophyllene oxide                                                                                                    | P | A | [137]     |
| 291 | <i>cis</i> -Lanceol                                                                                                                | P | A | [167]     |
| 292 | Cubenol                                                                                                                            | P | A | [176]     |
| 293 | Cuminaldehyde                                                                                                                      | A | P | [139]     |
| 294 | Cyclocolorenone                                                                                                                    | P | A | [164]     |
| 295 | Cycloprop[7,8]azuleno[3a,4 -b]oxirene,<br>decahydro-1,4a,7,7-tetramethyl-,<br>(1 <i>R</i> ,6 <i>aR</i> ,7 <i>aR</i> ,7 <i>bS</i> ) | P | A | [6]       |
| 296 | d-myrrthenal                                                                                                                       | A | P | [139]     |
| 297 | Davanone                                                                                                                           | A | P | [149]     |
| 298 | Dehydroarteannuin L                                                                                                                | P | A | [23]      |
| 299 | Dehydroartemisinin                                                                                                                 | P | A | [177]     |
| 300 | Deoxyarteannuin B                                                                                                                  | P | A | [169]     |
| 301 | Deoxyartemistene                                                                                                                   | P | A | [23]      |
| 302 | Dihydroarteannuin B                                                                                                                | P | A | [168]     |
| 303 | Dihydroartemisinic                                                                                                                 | P | A | [168]     |
| 304 | Dihydroartemisinic acid hydroperoxide                                                                                              | P | A | [65]      |
| 305 | Dihydroartemisinic alcohol                                                                                                         | P | A | [160]     |
| 306 | Dihydroartemisinic aldehyde                                                                                                        | P | A | [178]     |
| 307 | Dihydroxy-amorphane                                                                                                                | P | A | [168]     |
| 308 | Dihydroxycadinanolide                                                                                                              | P | A | [179]     |
| 309 | Dihyro-epi-deoxyarteannuin B                                                                                                       | P | A | [162]     |
| 310 | Elemol                                                                                                                             | P | A | [137]     |
| 311 | Elemyl acetate                                                                                                                     | P | A | [140]     |
| 312 | Epi-11-hydroxy-arteannuin I                                                                                                        | P | A | [23]      |
| 313 | Epi-Cubenol                                                                                                                        | P | A | [159]     |
| 314 | Epi-deoxyarteannuin B                                                                                                              | P | A | [169]     |
| 315 | Epi-globulol                                                                                                                       | P | P | [139,150] |
| 316 | Farnesal                                                                                                                           | P | A | [164]     |
| 317 | Farnesol                                                                                                                           | P | A | [136,160] |
| 318 | Farnesyl pyrophosphate                                                                                                             | P | A | [160]     |
| 319 | Germacrene B                                                                                                                       | P | A | [122]     |
| 320 | Germacrene D                                                                                                                       | p | p | [139,152] |
| 321 | Germacrene D-4-ol                                                                                                                  | P | P | [139,144] |
| 322 | Globulol                                                                                                                           | P | P | [139,140] |
| 323 | Humulene epoxide I                                                                                                                 | P | A | [170]     |
| 324 | Humulene epoxide II                                                                                                                | P | A | [137,147] |
| 325 | Intermedeol                                                                                                                        | A | P | [139]     |
| 326 | Intermediol                                                                                                                        | A | P | [139]     |
| 327 | Isoalantolactone                                                                                                                   | A | P | [180]     |
| 328 | Isoannulide                                                                                                                        | P | A | [168]     |
| 329 | Isoarteannuin A                                                                                                                    | P | A | [23]      |

|     |                                                                                                                 |   |   |           |
|-----|-----------------------------------------------------------------------------------------------------------------|---|---|-----------|
| 330 | Isopropyl-3- methylbenzene                                                                                      | A | P | [145]     |
| 331 | Kongol                                                                                                          | P | A | [139]     |
| 332 | Ledol                                                                                                           | P | A | [40]      |
| 334 | Maritimin                                                                                                       | A | P | [172]     |
| 335 | Nor-amorphane                                                                                                   | P | A | [162]     |
| 336 | Norannuic acid                                                                                                  | P | A | [152]     |
| 337 | Norannuic acid (bis-nor-amorphane)                                                                              | P | A | [152]     |
| 338 | Norannuic acid formyl ester                                                                                     | P | A | [162]     |
| 339 | Norsantolinifolide                                                                                              | A | P | [172]     |
| 340 | Occidentalol                                                                                                    | P | A | [137]     |
| 341 | Occidentalol acetate                                                                                            | P | A | [137]     |
| 342 | Occidol                                                                                                         | P | A | [137]     |
| 343 | Oxabicyclo[4.1.0]heptane, 4-(1,5-dimethyl-4-hexen-1- ylidene)-1-methyl-, (1 <i>R</i> ,4 <i>Z</i> ,6 <i>S</i> )- | A | P | [141]     |
| 344 | p-isopropyl phenol                                                                                              | A | P | [139]     |
| 345 | Pregeijerene                                                                                                    | P | A | [159]     |
| 346 | Santolinifolide A                                                                                               | A | P | [172]     |
| 347 | Selina-4,11-diene                                                                                               | P | A | [160]     |
| 348 | <i>t</i> -Muurolol                                                                                              | P | P | [140]     |
| 349 | Taurin                                                                                                          | A | P | [172]     |
| 350 | Trans- $\beta$ -selinene                                                                                        | P | A | [162]     |
| 351 | Trans-Arteannuic alcohol                                                                                        | P | A | [137]     |
| 352 | Trans-caryophyllene                                                                                             | P | P | [135,139] |
| 353 | Trans-Nerolidol                                                                                                 | P | A | [140]     |
| 354 | Trans- $\alpha$ -bergamotol                                                                                     | A | P | [139]     |
| 355 | Trans- $\alpha$ -bergamotol                                                                                     | A | P | [139]     |
| 356 | Trans- $\beta$ -farnesene                                                                                       | p | p | [139,155] |
| 357 | Tricosane                                                                                                       | A | P | [154]     |
| 358 | Umbellulone                                                                                                     | A | P | [66]      |
| 359 | Verbocidentene                                                                                                  | P | A | [170]     |
| 360 | Vetivazulene                                                                                                    | A | P | [181]     |
| 361 | $\alpha$ -Aromadendrene                                                                                         | P | A | [136]     |
| 362 | $\alpha$ -Copaene                                                                                               | P | P | [139,144] |
| 363 | $\alpha$ -epoxy-arteannuic acid                                                                                 | P | A | [161]     |
| 364 | $\alpha$ -Epoxyartemisinic acid                                                                                 | P | A | [168]     |
| 365 | $\alpha$ -Farnesene                                                                                             | P | A | [182]     |
| 366 | $\alpha$ -Gurjunene                                                                                             | P | A | [152]     |
| 367 | $\alpha$ -Humulene                                                                                              | p | p | [139,146] |
| 368 | $\alpha$ -Hydroxysantonin                                                                                       | P | A | [183]     |
| 369 | $\alpha$ -Selinene                                                                                              | p | P | [139,151] |
| 370 | $\beta$ -Cadinene                                                                                               | P | A | [152]     |
| 371 | $\beta$ -Caryophyllene                                                                                          | p | p | [139,176] |
| 372 | $\beta$ -Costol                                                                                                 | A | P | [139]     |
| 373 | $\beta$ -Eudesmo                                                                                                | P | A | [170]     |
| 374 | $\gamma$ -Cadinene                                                                                              | P | A | [137]     |
| 375 | $\gamma$ -Cadinol                                                                                               | P | A | [183]     |
| 376 | $\gamma$ -Eudesmol                                                                                              | P | A | [137]     |
| 377 | $\gamma$ -Muurolene                                                                                             | P | A | [137]     |
| 378 | $\gamma$ -Selinene                                                                                              | P | A | [170]     |
| 379 | $\delta$ -cadinene                                                                                              | P | A | [161]     |

P = Present, A = Absent



**Table S3:** Polyphenols from *A. annua* and *A. afra*

| N   | Compound                                                                         | <i>A. annua</i> | <i>A. afra</i> | Reference   |
|-----|----------------------------------------------------------------------------------|-----------------|----------------|-------------|
| 380 | 1-Caffeoyl-5-feruoylquinic acid                                                  | P               | P              | [184]       |
| 381 | 2-Methoxy-3-(2-propenyl) phenol                                                  | P               | A              | [136]       |
| 382 | 3-Allyl-6-methoxyphenol                                                          | P               | A              | [153]       |
| 383 | 3-Caffeoyl-4-feruloylquinic acid                                                 | P               | P              | [184]       |
| 384 | 3-Caffeoyl-5-feruloylquinic acid                                                 | P               | P              | [184]       |
| 385 | 3-Feruloyl-5-caffeoylquinic acid                                                 | P               | P              | [184]       |
| 386 | 3-p-O-coumaroyl-5-O-caffeoylquinic acid                                          | P               | A              | [10]        |
| 387 | 3,3,5,6,7-Pentahydroxy-3,4-dimethoxyflavone                                      | P               | A              | [185]       |
| 388 | 3,3',4',7,7-Pentahydroxyflavone, 3-O-6-D-Glucopyranoside.                        | P               | A              | [185]       |
| 389 | 3,4-Diferuoylquinic acid                                                         | P               | P              | [184]       |
| 390 | 3,5-Di-O-caffeoylquinic acid                                                     | P               | P              | [24]        |
| 391 | methyl-3,4-di-O-caffeoylquinic acid                                              | P               | A              | [185]       |
| 392 | 3,6'-O-diferuloylsucrose                                                         | P               | A              | [185]       |
| 293 | 3,5-Dicaffeoylquinic acid                                                        | P               | P              | [29], [134] |
| 394 | 5'- $\beta$ -D-glucopyranosyloxyjasmonic acid                                    | P               | A              | [185]       |
| 395 | 3,5-Diferuoylquinic acid                                                         | P               | P              | [184]       |
| 396 | 3,7-Dirhamnoside patuletin                                                       | P               | A              | [17]        |
| 397 | 3',5,7,8-Tetrahydroxy-3,4'-dimethoxyflavone                                      | P               | A              | [185]       |
| 398 | 4-Caffeoyl-5-feruloylquinic acid                                                 | P               | P              | [184]       |
| 399 | 4-Feruloyl-5-caffeoylquinic acid                                                 | P               | A              | [184]       |
| 400 | 4,5-Diferuoylquinic acid                                                         | P               | P              | [184]       |
| 401 | 4,5-Diferuoylquinic acid                                                         | P               | P              | [184]       |
| 402 | 4'-O-methylgenkwanin                                                             | A               | P              | [186]       |
| 403 | 4H-1-Benzopyran-4-one 5-hydroxy-2-(2-hydroxy-3,4-di-methoxyphenyl)-3,7-dimethoxy | P               | A              | [6]         |
| 404 | 5-hydroxy- 3,6,7,40-tetramethoxyflavone                                          | P               | A              | [187]       |
| 405 | 5, 7, 4'- trimethoxy-8,3''-dihydroxyflavone                                      | P               | A              | [40]        |
| 406 | 5,3'-Dihydroxy, 3,6,7,5'-tetramethoxyflavone                                     | P               | A              | [5]         |
| 407 | 7-Methoxyacetin                                                                  | A               | P              | [185]       |
| 408 | 7-Methoxyacetin                                                                  | A               | P              | [184]       |
| 409 | Acacetin                                                                         | A               | P              | [184]       |
| 410 | Iso-chlorogenic acid B                                                           | P               | P              | [184]       |
| 411 | Anethole                                                                         | P               | A              | [137]       |
| 412 | Apigenin                                                                         | P               | P              | [184,149]   |
| 413 | Apigenin-6-C-hexoside-8-C-pentoside.                                             | P               | A              | [10]        |
| 414 | Artemetin                                                                        | P               | A              | [6]         |
| 415 | Artemetin                                                                        |                 |                | [188]       |
| 416 | Artemisiannuside A                                                               | P               | A              | [105]       |
| 417 | Astragalin                                                                       | P               | P              | [163]       |
| 418 | Axillarin                                                                        | P               | A              | [189]       |
| 419 | Axillarin                                                                        | P               | A              | [186]       |
| 420 | Benzyl cinnamate                                                                 | P               | A              | [6]         |
| 421 | Bonanzin                                                                         | P               | A              | [33]        |
| 422 | Caffeic acid                                                                     | P               | P              | [48]        |
| 423 | Caffeoylcoumaroyltartaric acid                                                   | P               | A              | [10]        |

|     |                                 |   |   |           |
|-----|---------------------------------|---|---|-----------|
| 424 | Casticin                        | P | A | [190]     |
| 425 | Casticin                        | P | A | [190]     |
| 426 | Chlorogenic acid                | P | P | [29,48]   |
| 427 | Chrysoeriol                     | P | P | [184,149] |
| 428 | Chrysoeriol rutinoside          | P | A | [31]      |
| 429 | Chrysosplenetin                 | P | P | [190]     |
| 430 | Chrysosplenol C                 | P | P | [6]       |
| 432 | Chrysosplenol D                 | P | P | [6]       |
| 433 | Chrysosplenol E                 | P | P | [6]       |
| 434 | Cirsilineol                     | P | P | [190]     |
| 435 | Cirsiliol                       | P | A | [190]     |
| 436 | Cirsimaritin                    | P | A | [190]     |
| 437 | Cirsimaritin                    | P | A | [190]     |
| 438 | Coumaric acid                   | P | P | [6]       |
| 439 | Cynaroside                      | P | A | [186]     |
| 440 | Dihydroxy-dimethoxyl-O-hexoside | P | A | [10]      |
| 441 | Diosmetin                       | A | P | [184]     |
| 442 | Eleutheroside B                 | P | A | [10]      |
| 443 | Eriodictyol-7-O-hexoside.       | P | A | [10]      |
| 444 | Esculetin                       | P | P | [10]      |
| 445 | Eugenol                         | P | A | [140]     |
| 446 | Eugenyl isovalerate             | P | A | [6]       |
| 447 | Eupalitin                       | P | P | [33]      |
| 448 | Eupatin                         | P | P | [33]      |
| 449 | Eupatorin                       | P | A | [190]     |
| 450 | Fisetin                         | P | A | [10]      |
| 451 | Genkwanin                       | A | P | [184]     |
| 452 | Glucoluteolin                   | P | A | [190]     |
| 453 | Iso-kaempferide                 | P | A | [186]     |
| 454 | Isochlorogenic acid             | P | P | [184]     |
| 455 | Isochlorogenic acid A           | P | P | [184]     |
| 456 | Isochlorogenic acid C           | P | P | [184]     |
| 457 | Isoquercitrin                   | P | A | [190]     |
| 458 | Isorhamnetin                    | P | P | [190]     |
| 359 | Isorhamnetin                    | P | P | [190]     |
| 460 | Isorhamnetin 3-glucoside        | P | P | [190]     |
| 361 | Isorhamnetin-O-hexoside         | P | A | [10]      |
| 462 | kaempferol                      | p | P | [186,187] |
| 463 | Kaempferol-6-methoxy glucoside  | P | P | [186]     |
| 464 | Luteolin                        | p | P | [192,187] |
| 465 | Luteolin 7-O-pentoside          | P | A | [33]      |
| 466 | Luteolin-7- methyl ethe         | P | P | [190]     |
| 467 | Mearnsetin                      | P | A | [184]     |
| 468 | Mearnsetin- glucoside           | P | A | [184]     |
| 469 | Methyl cinnamate                | P | A | [6]       |
| 370 | Methyl eugenol                  | P | A | [137]     |
| 471 | Mikanin                         | P | A | [184]     |
| 472 | Ouercimeritrin                  | P | A | [186]     |
| 473 | <i>p</i> -Allylanisole          | P | A | [6]       |
| 474 | Pachypodal                      | P | A | [167]     |
| 475 | Patuletin                       | P | A | [190]     |

|     |                                           |   |   |           |
|-----|-------------------------------------------|---|---|-----------|
| 476 | Patuletin-3-O-glucoside                   | P | A | [190]     |
| 477 | Penduletin                                | P | P | [195]     |
| 478 | Quercetagenin 3,4'-dimethyl -ether        | P | A | [190]     |
| 579 | Quercetagenin-3-methylether               | P | A | [190]     |
| 480 | Quercetagenin-3,4'- dimethyl ether        | P | A | [189]     |
| 481 | Quercetagenin-4-methylether               | P | A | [190]     |
| 482 | Quercetagenin-6,7,3',4'- tetramethylether | P | A | [6]       |
| 483 | Quercetin                                 | p | P | [187]     |
| 484 | Quercetin                                 | P | P | [190]     |
| 485 | Quercetin 3-rutinoside                    | P | P | [190]     |
| 486 | Quercetin-3-glucoside                     | P | P | [190]     |
| 487 | Quercetin-3-methylether                   | P | P | [6]       |
| 488 | Quercetin-3'-glucoside                    | P | P | [190]     |
| 489 | Quercimeritrin                            | P | A | [190]     |
| 490 | Quinic acid                               | P | P | [184]     |
| 491 | Retusin                                   | P | P | [168]     |
| 492 | Rhamnetin                                 | P | P | [190]     |
| 493 | Rhamnocitrin                              | P | A | [190]     |
| 494 | Rosmarinic acid                           | P | A | [34]      |
| 494 | Rutin                                     | P | P | [24,186]  |
| 495 | Tamarixetin                               | P | P | [184,190] |
| 496 | Tamarixetin                               | P | A | [190]     |
| 497 | Vitexin (8-C-glucosyl apigenin)           | P | P | [191]     |

P = Present, A = Absent

**Table S4:** Triterpenes from *A. annua* and *A. afra*.

| N   | Compound                 | <i>A. annua</i> | <i>A. afra</i> | Reference |
|-----|--------------------------|-----------------|----------------|-----------|
| 498 | Baurenol                 | P               | A              | [153]     |
| 499 | Betulinic acid           | P               | A              | [167]     |
| 500 | Daucosterol              | P               | A              | [6]       |
| 501 | Friedelan-3- $\beta$ -ol | P               | A              | [171]     |
| 502 | Friedelin                | P               | P              | [172,191] |
| 503 | Oleanolic acid           | P               | A              | [153]     |
| 504 | Squalene                 | A               | P              | [170]     |
| 505 | Stigmasterol             | P               | A              | [6]       |
| 506 | Taraxasterone            | P               | A              | [153]     |
| 507 | Taraxerol acetate        | P               | A              | [17]      |
| 508 | $\alpha$ -Amyrenone      | P               | A              | [153]     |
| 509 | $\alpha$ -Amyrin         | P               | P              | [153,191] |
| 510 | $\beta$ -Amyrin          | P               | P              | [153,191] |
| 511 | $\beta$ -Amyrin acetate  | P               | A              | [171]     |
| 512 | $\beta$ -Friedelan-3-ol  | P               | A              | [6]       |
| 513 | $\beta$ -Sitosterol      | P               | A              | [6]       |

P = Present, A = Absent

**Table S5:** Coumarins from *A. annua* and *A. afra*.

| N   | Compound                    | <i>A. annua</i> | <i>A. afra</i> | Reference |
|-----|-----------------------------|-----------------|----------------|-----------|
| 514 | ( $\pm$ )-Qinghaocoumarin A | P               | A              | [33]      |

|     |                                          |   |   |               |
|-----|------------------------------------------|---|---|---------------|
| 515 | 12-Hydroxy- $\alpha$ -cyperone           | P | P | [172,192]     |
| 516 | 2,2-Dihydroxy-6-methoxy-2H-1- benzopyran | P | A | [6]           |
| 517 | 2,2,6-Trihydroxychromene                 | P | A | [6]           |
| 518 | 2,4-Di- hydroxy-6-methoxyacetophenone    | P | A | [151]         |
| 519 | 5-Nonadecylresorcinol 3-O-methyl ether   | P | A | [6]           |
| 520 | 6,7-Dimethoxydihydrocoumarin             | P | A | [6]           |
| 521 | Cis-melilotoside                         | P | A | [32]          |
| 522 | Trans-melilotoside                       | P | A | [32]          |
| 523 | Coumarin                                 | P | P | [6]           |
| 524 | Eleutheroside B                          | P | A | [193]         |
| 525 | Esculetin                                | P | P | [194]         |
| 526 | Iso-Fraxidin                             | P | P | [172,180,187] |
| 527 | Ouebrachitol                             | A | P | [195]         |
| 528 | Qinghaocoumarin B                        | P | A | [192]         |
| 529 | Sacoparone                               | P | A | [6]           |
| 530 | Scopoletin                               | P | P | [187,193]     |
| 531 | Scopolin                                 | P | P | [24]          |
| 532 | Tomentin                                 | P | A | [29]          |
| 533 | Trimethoxy-coumarin                      |   |   | [31]          |
| 534 | Umbelliferone derivatives                | A | P | [6]           |

P = Present, A = Absent

**Table S6:** Diterpenes from *A. annua* and *A. afra*

| N   | Compound                                          | <i>A. annua</i> | <i>A. afra</i> | Reference |
|-----|---------------------------------------------------|-----------------|----------------|-----------|
| 535 | (2E)-Hexadecene                                   | P               | A              | [19]      |
| 536 | 13- <i>epi</i> -manool (8(17),14- labdadien-13-ol | P               | A              | [137]     |
| 537 | 7R,11R-phytol                                     | P               | A              | [135]     |
| 537 | 8(14),15-isopimaradiene                           | P               | A              | [137]     |
| 538 | Abscisic acid                                     | P               | A              | [194]     |
| 539 | Isophytol                                         | P               | A              | [137]     |
| 540 | Phytene-1-ol-2-hydroperoxide                      | P               | A              | [135]     |
| 541 | Phytene-1,2-diol                                  | P               | A              | [6]       |
| 542 | Phytol                                            | P               | P              | [135,167] |
| 543 | Phytone                                           | P               | A              | [136]     |

P = Present, A = Absent

**Table S7:** Guaianolides from *A. annua* and *A. afra*.

| N   | Compound                       | <i>A. annua</i> | <i>A. afra</i> | Reference |
|-----|--------------------------------|-----------------|----------------|-----------|
| 544 | 11,13-Dihydromatricarin        | A               | P              | [17]      |
| 545 | Guaianolides 1 (2 derivatives) | A               | P              | [170]     |

|     |                                                     |   |   |           |
|-----|-----------------------------------------------------|---|---|-----------|
| 546 | Guaianolides 2 (6 derivatives)                      | A | P | [173,17]  |
| 547 | Guaianolides 3 (11 derivatives)                     | A | P | [161,174] |
| 548 | Guaianolides 4 (2 derivatives)                      | A | P | [170]     |
| 549 | Guaianolides 5 (3 derivatives)                      | A | P | [170]     |
| 550 | 1 $\alpha$ ,4 $\alpha$ -Dihydroxybishopsolicepolide | A | P | [14]      |
| 551 | Yomogiartemin                                       | A | P | [14]      |

P = Present, A = Absent

**Table S8:** Simple Aryl Ketones from *A. annua* and *A. afra*.

| N   | Compound                               | <i>A. annua</i> | <i>A. afra</i> | Reference |
|-----|----------------------------------------|-----------------|----------------|-----------|
| 552 | 2-Hydroxy-4,6-dimethoxyacetophenone    | P               | A              | [6]       |
| 553 | 2,4-dihydroxy-6-methoxyacetophenone    | A               | P              | [36]      |
| 554 | 2',4'-dihydroxy-6'-methoxyacetophenone | P               | A              | [6]       |
| 555 | Annphenone                             | P               | A              | [151]     |
| 556 | Domesticoside                          | P               | A              | [195]     |
| 557 | <i>p</i> -Hydroxyacetophenone          | A               | P              | [36]      |

P = Present, A = Absent

**Table S9:** Glaucolides from *A. annua* and *A. afra*.

| N   | Compound                             | <i>A. annua</i> | <i>A. afra</i> | Reference |
|-----|--------------------------------------|-----------------|----------------|-----------|
| 558 | 12-Hydroxy- $\alpha$ -cyperone       | A               | P              | [170]     |
| 559 | 1 $\alpha$ -Hydroxyafraglaucolide    | A               | P              | [170]     |
| 560 | 1 $\alpha$ -Hydroxyisoafraglaucolide | A               | P              | [170]     |
| 561 | 1 $\beta$ -Hydroxyafraglaucolide     | A               | P              | [170]     |
| 562 | Artemisia glaucolide                 | A               | P              | [170]     |
| 563 | Eudesmaafraglaucolide glaucolide 7   | A               | P              | [173,17]  |

P = Present, A = Absent

**Table S10:** Long chain alkanes from *A. annua* and *A. afra*.

| N   | Compound                             | <i>A. annua</i> | <i>A. afra</i> | Reference |
|-----|--------------------------------------|-----------------|----------------|-----------|
| 564 | Cerylcerotinate                      | A               | P              | [191]     |
| 565 | Dodecane                             | P               | A              | [6]       |
| 566 | Heneicosane                          | P               | A              | [137]     |
| 567 | Hexacosane                           | P               | A              | [137]     |
| 568 | Hexadecane                           | P               | A              | [6]       |
| 569 | Nonacosane                           | A               | P              | [191]     |
| 570 | Nonadecane                           | P               | A              | [137]     |
| 571 | Pentacosane                          | P               | A              | [137]     |
| 572 | Tetracosane                          | P               | A              | [137]     |
| 573 | Tetratriacontane                     | P               | A              | [146]     |
| 574 | Triacotane 6-triacontanone wax ester | A               | P              | [188]     |
| 575 | Tridecane                            | P               | A              | [6]       |
| 576 | Wax ester                            | A               | P              | [191]     |

P = Present, A = Absent

**Table S11:** Other compounds from *A. annua* and *A. afra*.

| N   | Compound                         | <i>A. annua</i> | <i>A. afra</i> | Reference |
|-----|----------------------------------|-----------------|----------------|-----------|
| 577 | (R)-15,16-Didehydrocoriolic acid | P               | A              | [105]     |

|     |                                            |   |   |       |
|-----|--------------------------------------------|---|---|-------|
| 578 | Homoeriodictyol                            | P | A | [105] |
| 579 | Qinghaosu I and III                        | P | A | [35]  |
| 580 | Cadinanolide                               | P | A | [196] |
| 581 | n-heptadecanyl- $\beta$ -D-glucopyranoside | P | A | [150] |
| 582 | n-Cos-(Z)-9-enoic acid.                    | P | A | [150] |
| 583 | n-Cos-(Z)-10-enoic acid                    | P | A | [150] |
| 584 | n-Nonacosanyl n-octadec-9, 12-dienoate.    | P | A | [150] |
| 585 | n-Heptadecanyl linoleate                   | P | A | [150] |
| 586 | 1-Octacosanol                              | P | A | [150] |
| 587 | Isodocosanol                               | P | A | [150] |
| 588 | Isononadecano                              | P | A | [150] |
| 589 | Qinghaolignan A.                           | P | A | [86]  |
| 590 | Qinghaolignan B                            | P | A | [86]  |
| 591 | 3,5-Cycloheptadienone                      | P | A | [6]   |
| 592 | 5-Methyl-2-furancarboxyaldehyde            | P | A | [86]  |
| 593 | Hexylcyclohexane                           | P | A | [137] |
| 594 | Jasmone                                    | P | A | [141] |
| 595 | 2,5-Dihydro-3-methylfuran                  | P | A | [138] |
| 596 | Anisole                                    | P | A | [6]   |
| 597 | Benzyl valerate                            | P | A | [136] |
| 598 | Isoamyl salicylate                         | P | A | [6]   |
| 599 | Phenylpropanoic acid                       | P | A | [135] |
| 600 | 2-Methylbutanoic acid                      | P | A | [6]   |
| 602 | 3-Methylbutana                             | P | A | [6]   |
| 603 | (Z)-2-Nonenal                              | P | A | [138] |
| 604 | Benzyl isovalerate                         | P | A | [136] |
| 605 | Amyl 2-methylbutyrate                      | P | A | [137] |
| 606 | 2-Benzyl octanal                           | P | A | [6]   |
| 607 | 3-Hexenyl butanoate                        | P | A | [136] |
| 608 | Trans-2,4-Hexadiene                        | P | A | [125] |
| 609 | vitexnegheteroin M                         | P | A | [197] |
| 610 | sibricose A5                               | P | A | [197] |
| 611 | securoside A                               | P | A | [197] |
| 612 | citrusin D                                 | P | A | [197] |

P = Present, A = Absent
